# Supplementary material
Source: Springer Nature journal article supplement (https://www.springermedizin.de/resource/supplementary/12889_2008_1353_MOESM3_ESM.pdf/9503020)

# women

## heart disease

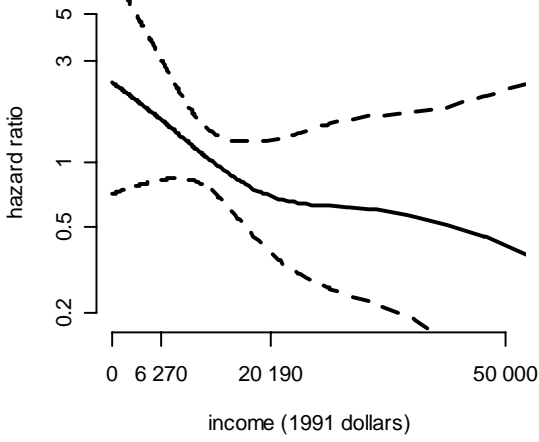

# men

## heart disease

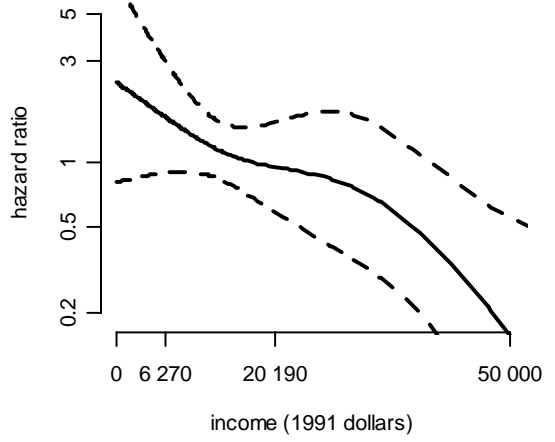

## cancer

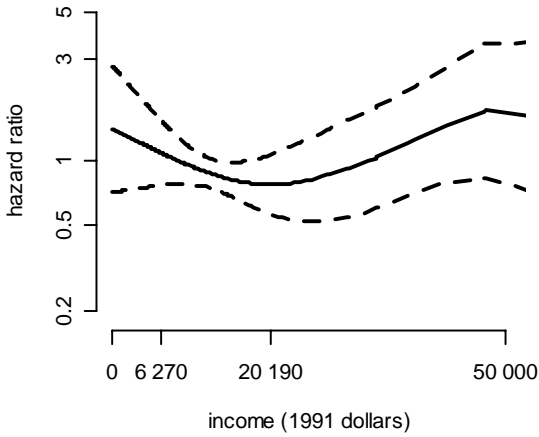

## cancer

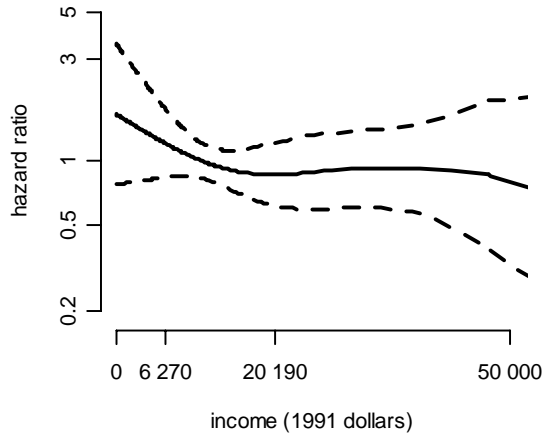

## injury

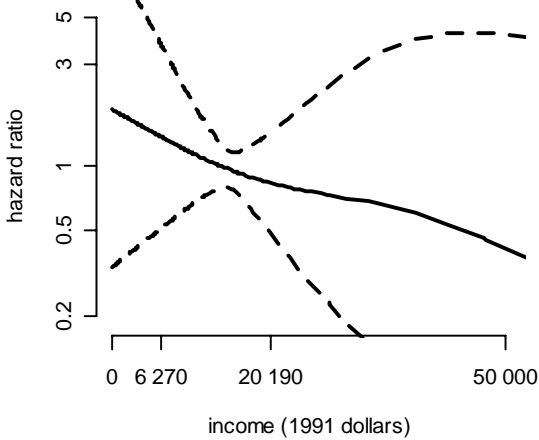

## injury

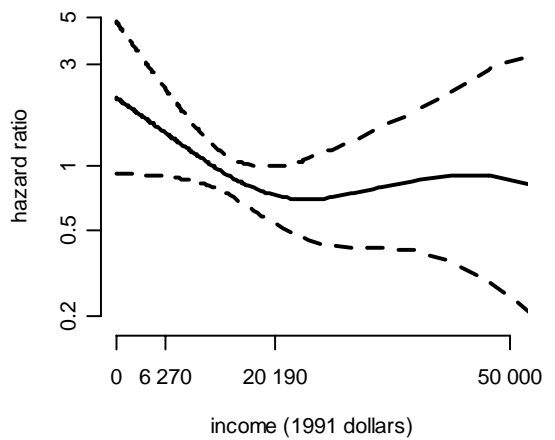

Supplement: MOESM3 [file 9503020]
